# Supplementary material for: Research Progress on the Mechanisms of Terrestrial Plant Uptake, Transport, and Growth Inhibition Responses to Micro (nano) Plastics
Source: Preprints.org preprint supplement (doi:10.20944/preprints202407.0483.v1), 2024-07-08
Supplement: Supplementary file 2 [file supplementary]

## NATIVE English Editing

<https://www.nativeeee.com>

Address: 18 East Jiuxianqiao Road,

Chaoyang District, Beijing, China

Phone: +861064125081

21<sup>st</sup> June, 2024

### STATEMENT OF EDITING

This is to certify that the following document has been checked and corrected for proper English language, grammar, punctuation, spelling, and overall style by one or more of the highly-qualified, native English-speaking editors at Native English Editing.

Native English Editing provides editing and proofreading of scientific manuscripts for submission to peer-reviewed journals.

Manuscript title: Research Progress on the Mechanisms of Terrestrial Plant Uptake, Transport, and Growth Inhibition Responses to Micro (nano) Plastics

Date Issued: 21<sup>st</sup> June, 2024

Certificate Verification Key: 2024061753565248

Yours truly,



Graeme Brown

Co-owner Native English Editing

Email: [publish@nativeeee.com](mailto:publish@nativeeee.com)

Contact information of Beijing sales department in China:

Address: 18 East Jiuxianqiao Road, Chaoyang District, Beijing, China

Phone: +861064125081

Fax: +861064125081

Contact information of Australian editorial department:

Address: 42D Melrose Street, Parkdale Vic 3195, Australia

Phone: +61417560758
